# Supplementary material for: A comparison of the photochemical reactivity of N@C60 and C60: photolysis with disiliraneElectronic supplementary information (ESI) available: experimental results. See http://www.rsc.org/suppdata/cc/b3/b309470g/
Source: Royal Society of Chemistry journal article supplement (doi:10.1039/b309470g), 2003-01-01
Supplement: b309470g.pdf [file b309470g.pdf]

## Electronic Supplementary Information (ESI)

Scheme 1

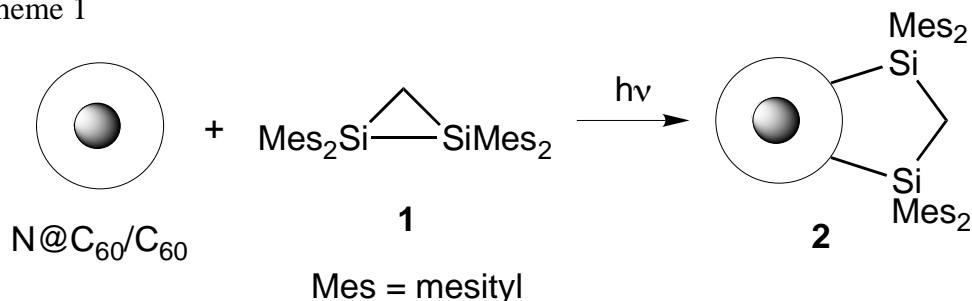

The photo-irradiation of a toluene solution of 1,1,2,2-tetramesityl-1,2-disilirane **1** (1.8 mg,  $1.4 \times 10^{-3}$  M) and N@C<sub>60</sub>/C<sub>60</sub> (2.3 mg,  $1.4 \times 10^{-3}$  M) gave a mixture of 1,1,3,3-tetramesityl-1,3-disilolane **2** and unreacted N@C<sub>60</sub>/C<sub>60</sub> (Scheme 1).

The reaction mixture was injected into a Gel 1H + 2H column, and **2** (63%) and unreacted N@C<sub>60</sub>/C<sub>60</sub> (32%) were recovered.

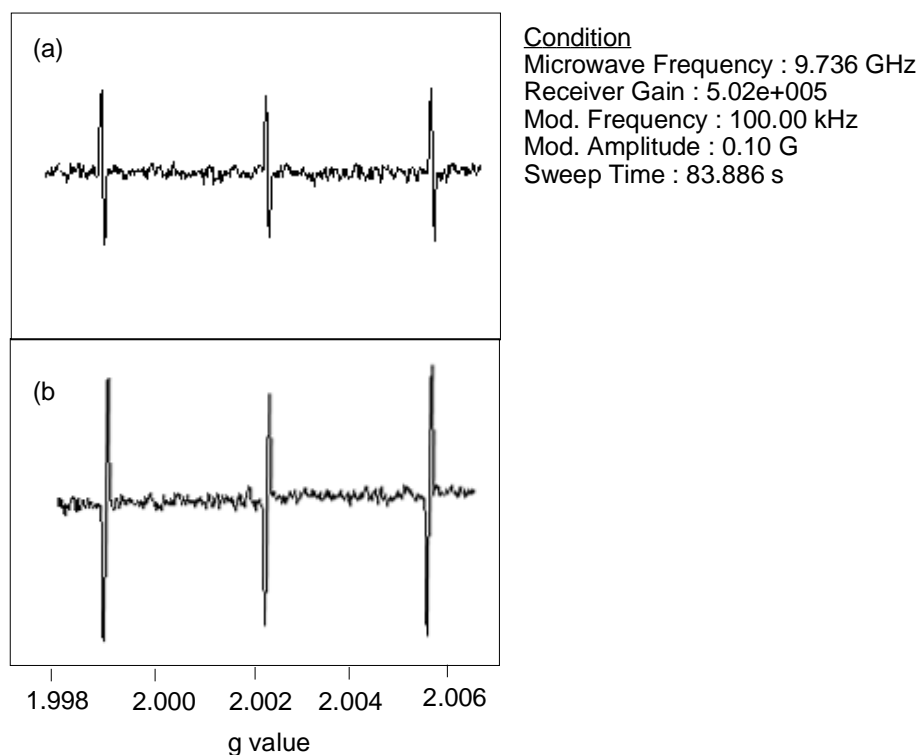

**Fig.** ESR spectra of (a) starting N@C<sub>60</sub>/C<sub>60</sub> and (b) recovered N@C<sub>60</sub>/C<sub>60</sub> (1st).

Table Experimental results

| entry | yield of <b>2</b> | yield of recovered N@C <sub>60</sub> /C <sub>60</sub> | concentration ratio* | relative reactivity |
|-------|-------------------|-------------------------------------------------------|----------------------|---------------------|
| 1st   | 63 %              | 32 %                                                  | 1:1.6                | 0.72                |
| 2nd   | 60 %              | 12 %                                                  | 1:4.0                | 0.59                |
| 3rd   | 50 %              | 30 %                                                  | 1:1.5                | 0.78                |

\* The ratio of N@C<sub>60</sub> and C<sub>60</sub> in the starting and recovered N@C<sub>60</sub>/C<sub>60</sub>.
